# Supplementary material for: Cyclometalated platinum(ii) complexes of 2,2′-bipyridine N-oxide containing a 1,1′-bis(diphenylphosphino)ferrocene ligand: structural, computational and electrochemical studies
Source: Royal Society of Chemistry journal article supplement (doi:10.1039/c6dt04085c), 2017-01-01
Supplement: c6dt04085c1.pdf [file c6dt04085c1.pdf]

## Electronic Supplementary Information

### **Cyclometalated platinum(II) complexes of 2,2'-bipyridine *N*-oxide containing 1,1'-bis(diphenylphosphino)ferrocene ligand: Structural, computational and electrochemical studies**

*Hamid R. Shahsavari,<sup>a\*</sup> Masood Fereidoonzhad,<sup>b,e\*</sup> Maryam Niazi,<sup>a</sup> S. Talaat Mosavi,<sup>a</sup> Sayed Habib Kazemi,<sup>a</sup> Reza Kia,<sup>c\*</sup> Shima Shirkhan,<sup>b</sup> Siamak Abdollahi Aghdam<sup>a</sup> and Paul R. Raithby<sup>d</sup>*

<sup>a</sup>Department of Chemistry, Institute for Advanced Studies in Basic Sciences (IASBS), Yousef Sobouti Blvd., Zanzan 45137-6731, Iran.

<sup>b</sup>Department of Medicinal Chemistry, School of Pharmacy, Ahvaz Jundishapur University of Medical Sciences, Ahvaz, Iran.

<sup>c</sup>Chemistry Department, Sharif University of Technology, P.O. Box 11155-3516, Tehran, Iran.

<sup>d</sup>Department of Chemistry, University of Bath, Claverton Down, Bath, Avon BA2 7AY, United Kingdom.

<sup>e</sup>Cancer, Environmental and Petroleum Pollutants Research Center, Ahvaz Jundishapur University of Medical Sciences, Ahvaz, Iran.

Email: [shahsavari@iasbs.ac.ir](mailto:shahsavari@iasbs.ac.ir); [fereidoonzhad-m@ajums.ac.ir](mailto:fereidoonzhad-m@ajums.ac.ir), [rkia@sharif.edu](mailto:rkia@sharif.edu)

| <b>Contents:</b>                                                                                                                                                                | <b>Page</b> |
|---------------------------------------------------------------------------------------------------------------------------------------------------------------------------------|-------------|
| <b>Figure S1.</b> $^1\text{H}$ NMR spectrum of complex <b>1</b> in $\text{CDCl}_3$ at room temperature.                                                                         | 3           |
| <b>Figure S2.</b> $^{31}\text{P}$ $\{^1\text{H}\}$ NMR spectrum of complex <b>1</b> in $\text{CDCl}_3$ at room temperature.                                                     | 4           |
| <b>Figure S3.</b> $^{195}\text{Pt}$ $\{^1\text{H}\}$ NMR spectrum of complex <b>1</b> in $\text{CDCl}_3$ at room temperature.                                                   | 5           |
| <b>Figure S4.</b> $^1\text{H}$ NMR spectrum of complex <b>2</b> in $\text{CDCl}_3$ at room temperature.                                                                         | 6           |
| <b>Figure S5.</b> $^{195}\text{Pt}$ $\{^1\text{H}\}$ NMR spectrum of complex <b>2</b> in $\text{CDCl}_3$ at room temperature.                                                   | 7           |
| <b>Table S1.</b> Crystallographic and structure refinement data for complex <b>2</b> .                                                                                          | 8           |
| <b>Table S2.</b> Absorption data in $\text{CH}_2\text{Cl}_2$ solution ( $5 \times 10^{-5}$ M) at 298 K.                                                                         | 9           |
| <b>Table S3.</b> G09/B3LYP calculated one-electron energy and percentage composition of selected frontier MOs of complex <b>2</b> expressed in terms of component fragments.    | 9           |
| <b>Figure S6.</b> Contour plots of the selected frontier molecular orbitals of complex <b>2</b> .                                                                               | 10          |
| <b>Figure S7.</b> Experimental and simulated UV-vis spectra for complexes <b>2</b> (calculated absorption spectra, showing by bars).                                            | 10          |
| <b>Table S4.</b> Oxidation/reduction potentials for the free dppf ligand and complexes <b>1-4</b> , in acetonitrile.                                                            | 11          |
| <b>Figure S8.</b> Voltammograms recorded for the free dppf ligand and complexes <b>1-4</b> , in 0.05 M $\text{LiClO}_4$ -Acetonitrile at a scan rate of $5 \text{ mV s}^{-1}$ . | 11          |

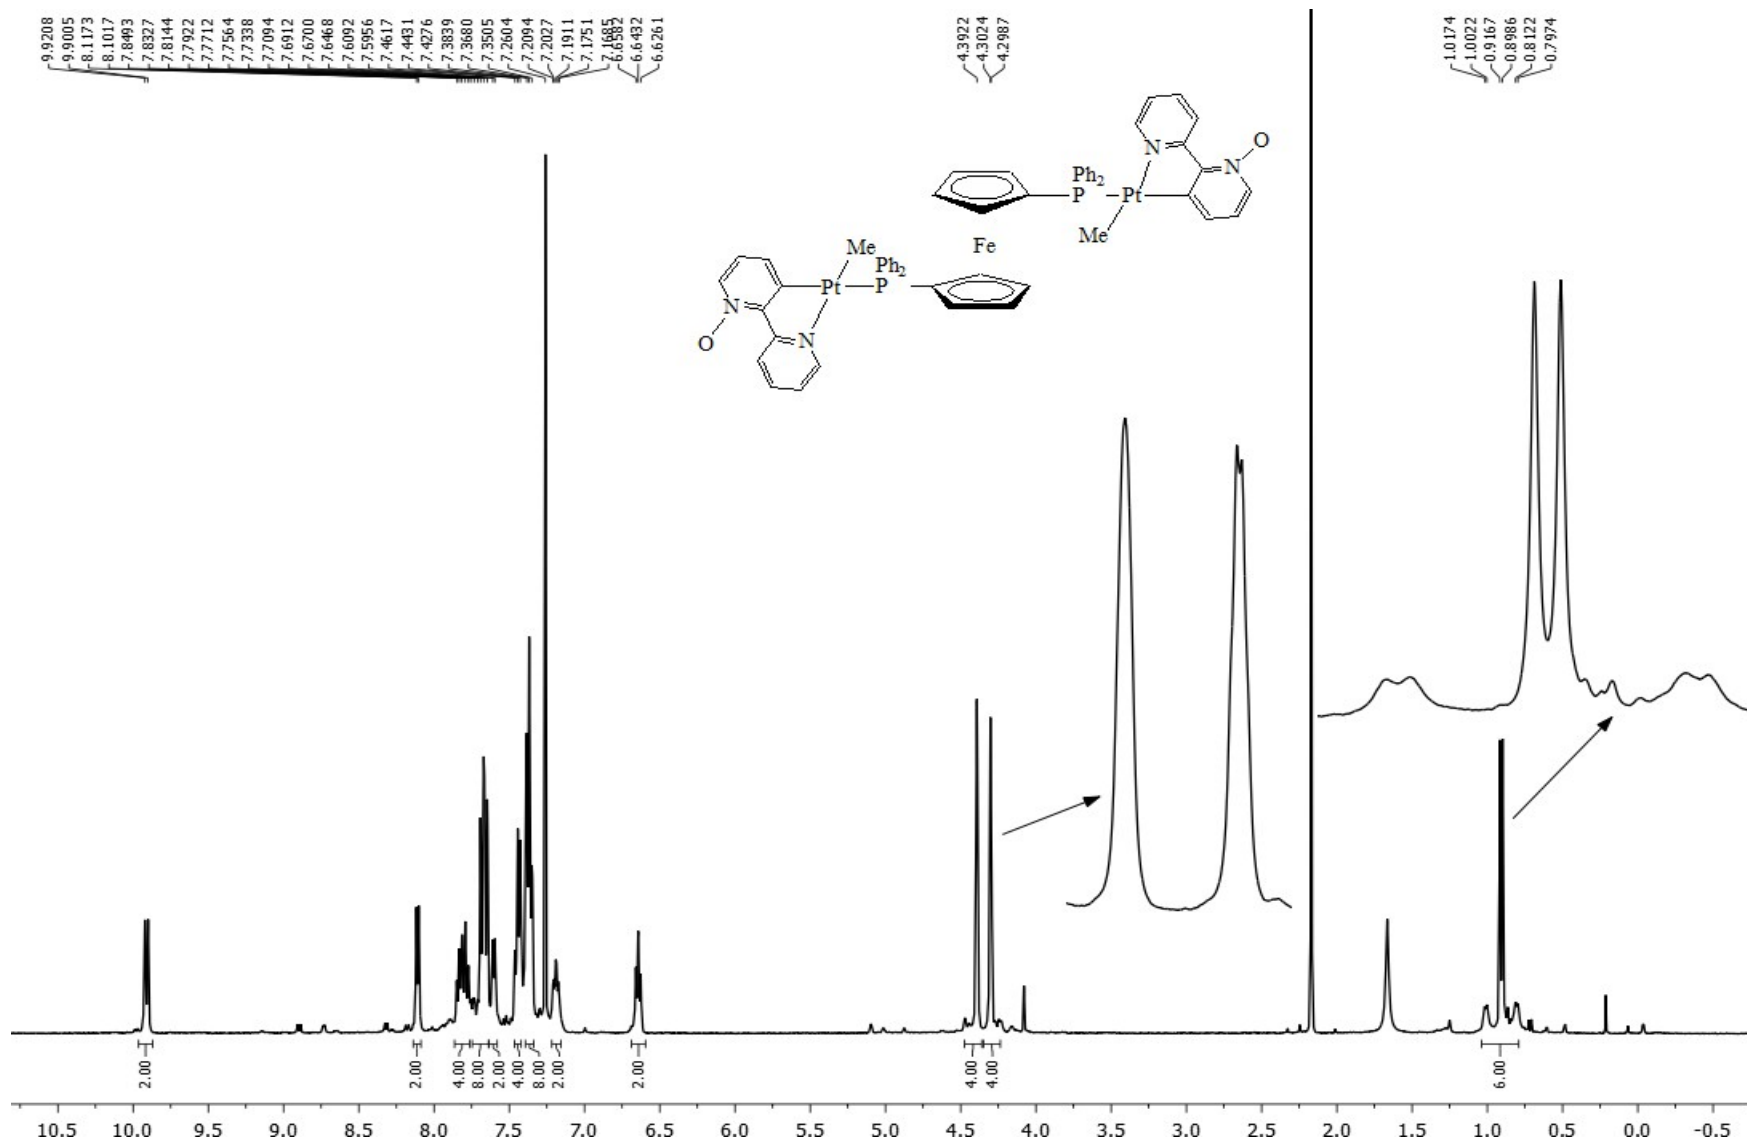

**Figure S1.**  $^1\text{H}$  NMR spectrum of complex **1** in  $\text{CDCl}_3$  at room temperature.

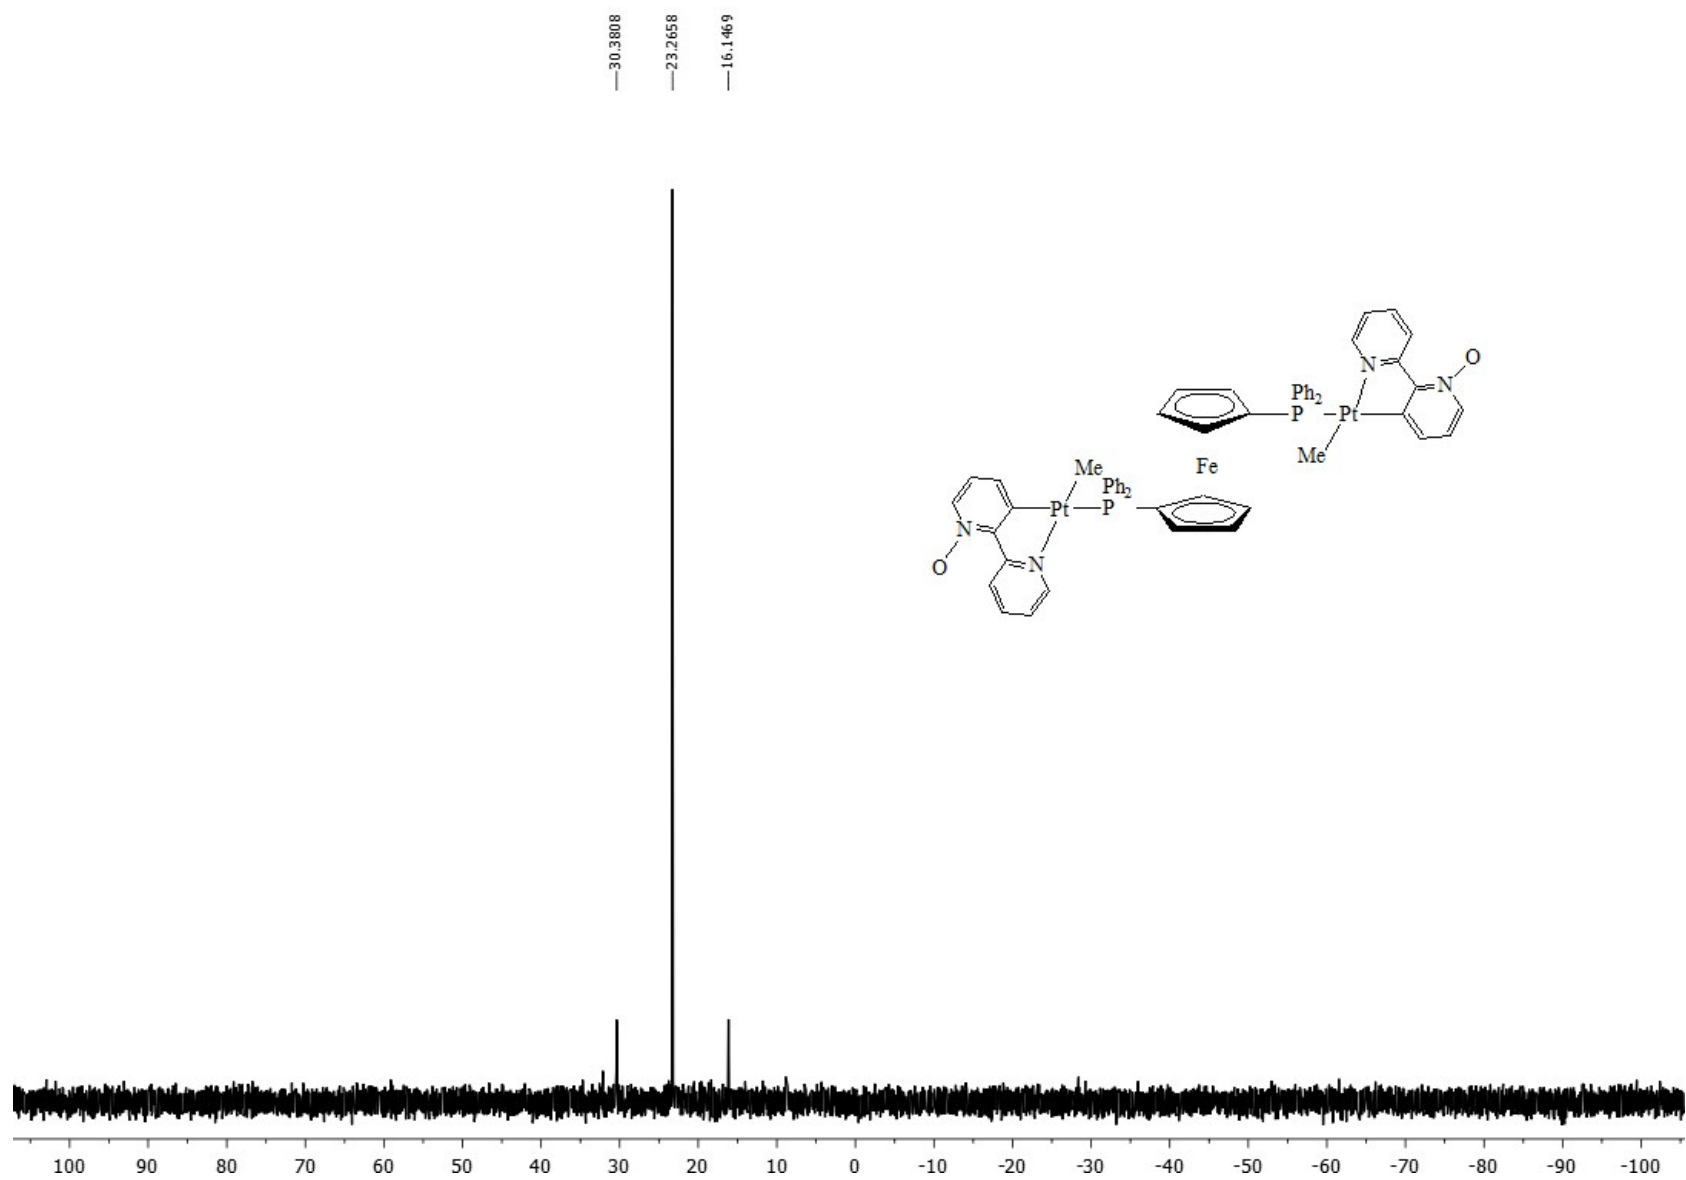

**Figure S2.**  $^{31}\text{P}$   $\{^1\text{H}\}$  NMR spectrum of complex **1** in  $\text{CDCl}_3$  at room temperature.

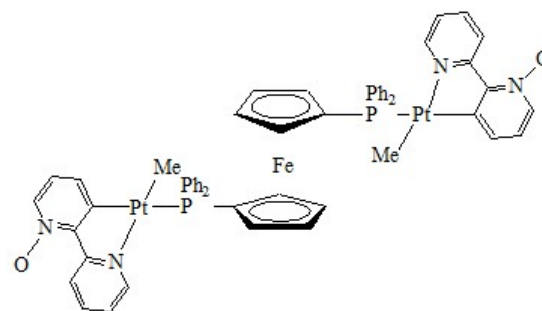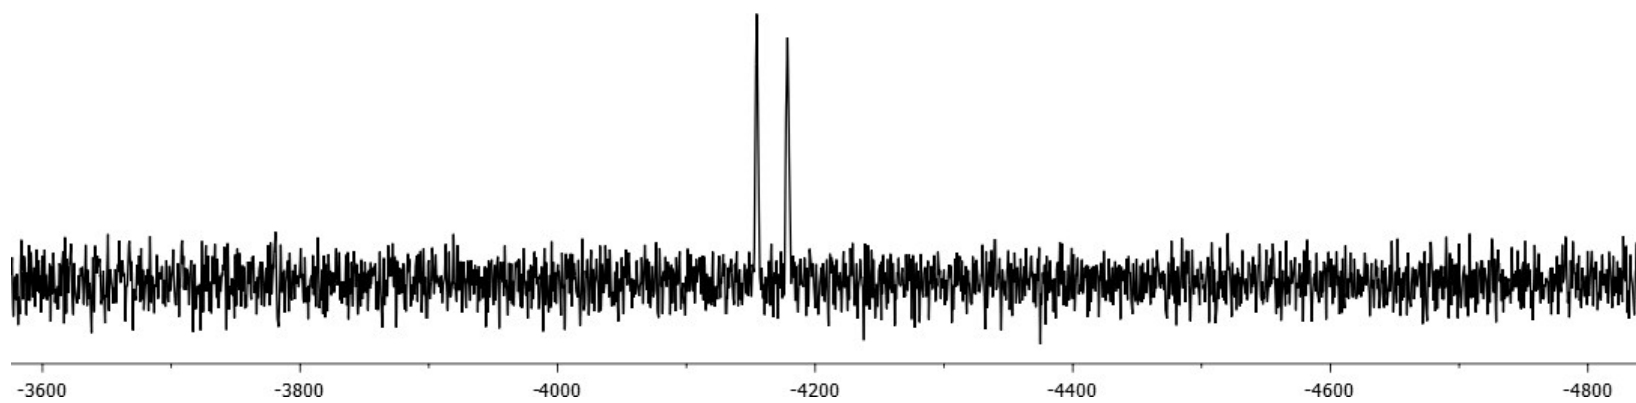

**Figure S3.** <sup>195</sup>Pt {<sup>1</sup>H} NMR spectrum of complex **1** in CDCl<sub>3</sub> at room temperature.

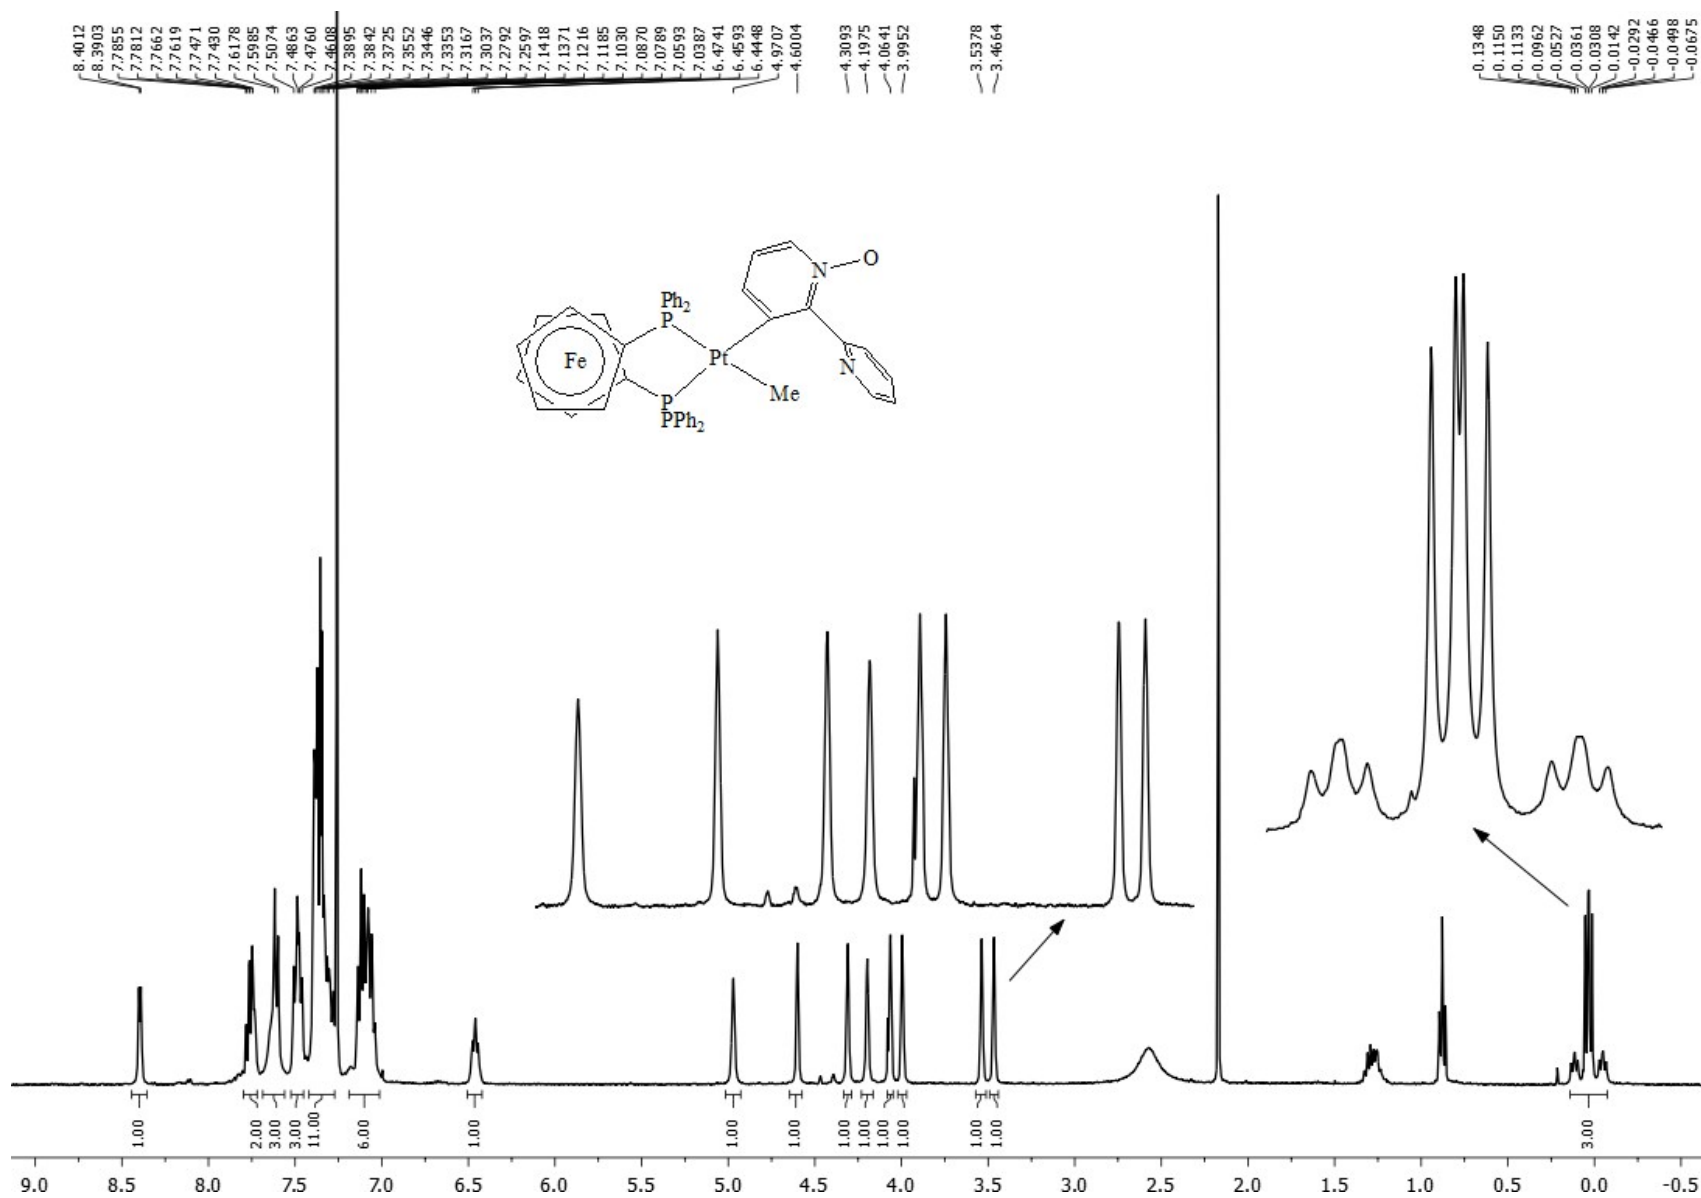

**Figure S4.** <sup>1</sup>H NMR spectrum of complex 2 in CDCl<sub>3</sub> at room temperature.

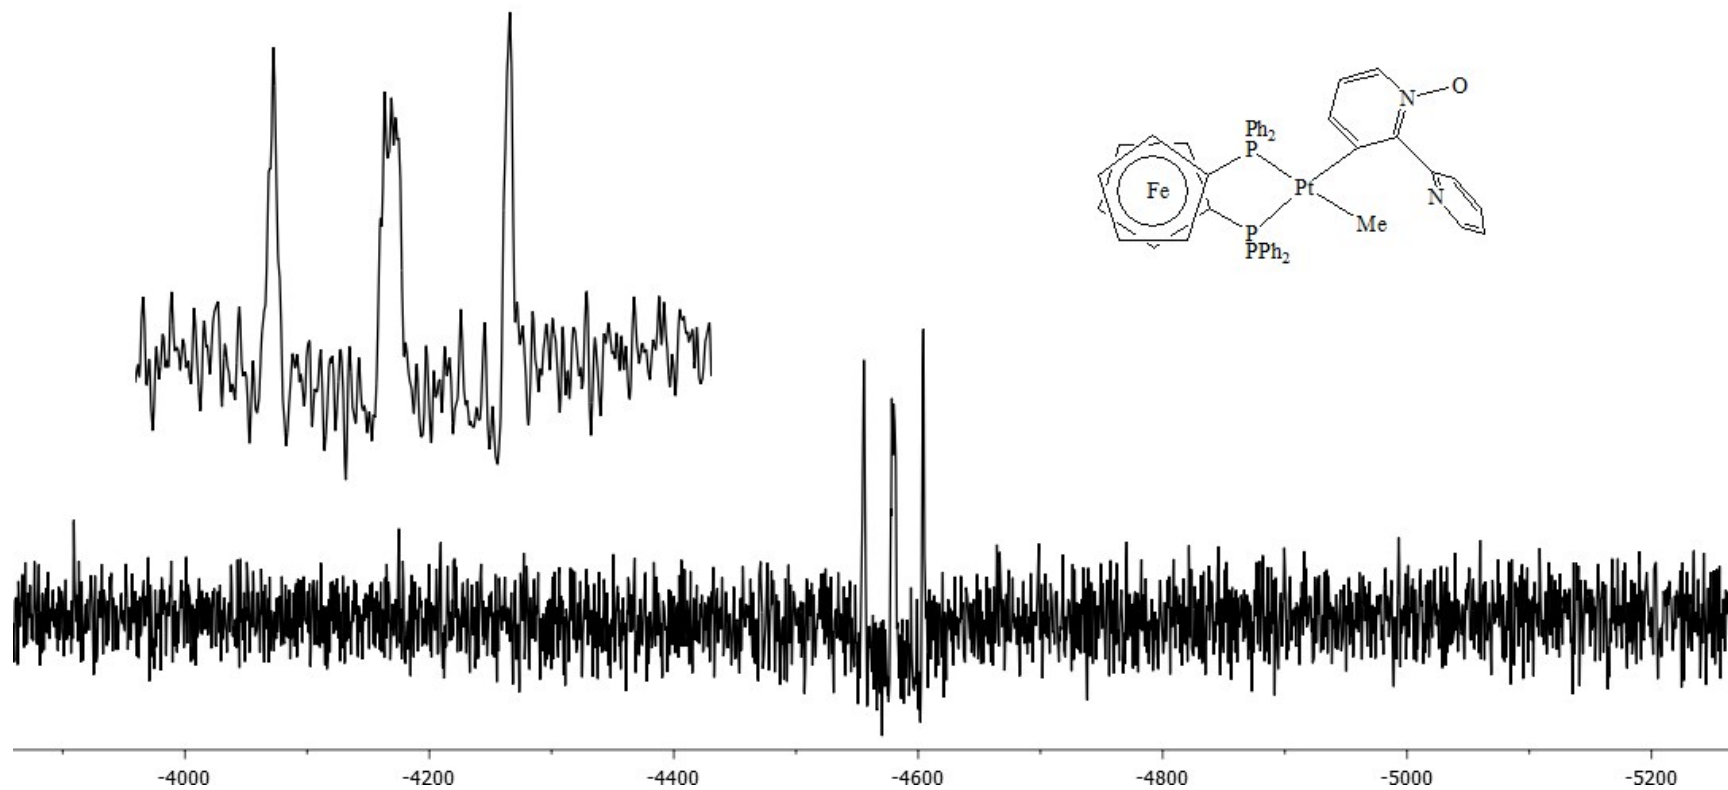

**Figure S5.**  $^{195}\text{Pt}$   $\{^1\text{H}\}$  NMR spectrum of complex **2** in  $\text{CDCl}_3$  at room temperature.

**Table S1.** Crystallographic and structure refinement data for complex **2**.

|                                                                                                                |                                                                     |
|----------------------------------------------------------------------------------------------------------------|---------------------------------------------------------------------|
| Formula                                                                                                        | C <sub>45</sub> H <sub>38</sub> FeN <sub>2</sub> OP <sub>2</sub> Pt |
| Formula weight                                                                                                 | 935.65                                                              |
| T (K)                                                                                                          | 293(2)                                                              |
| $\lambda$ (Å)                                                                                                  | 0.71073                                                             |
| Crystal system                                                                                                 | Orthorhombic                                                        |
| Space Group                                                                                                    | <i>P2<sub>1</sub>2<sub>1</sub>2<sub>1</sub></i>                     |
| Crystal size(mm)                                                                                               | 0.600 × 0.200 × 0.080                                               |
| <i>a</i> (Å)                                                                                                   | 10.49700(10)                                                        |
| <i>b</i> (Å)                                                                                                   | 11.74800(10)                                                        |
| <i>c</i> (Å)                                                                                                   | 30.0430(4)                                                          |
| $\alpha$ (°)                                                                                                   | 90                                                                  |
| $\beta$ (°)                                                                                                    | 90                                                                  |
| $\gamma$ (°)                                                                                                   | 90                                                                  |
| <i>V</i> (Å <sup>3</sup> )                                                                                     | 3704.87(7)                                                          |
| <i>Z</i>                                                                                                       | 4                                                                   |
| <i>D</i> <sub>calc</sub> (g cm <sup>-3</sup> )                                                                 | 1.677                                                               |
| $\theta_{\min}$ , $\theta_{\max}$ (°)                                                                          | 2.934-27.450                                                        |
| <i>F</i> <sub>000</sub>                                                                                        | 1856                                                                |
| $\mu$ (mm <sup>-1</sup> )                                                                                      | 4.289                                                               |
| Index ranges                                                                                                   | -13 ≤ <i>h</i> ≤ 13<br>-15 ≤ <i>k</i> ≤ 15<br>-38 ≤ <i>l</i> ≤ 38   |
| Data collected                                                                                                 | 8452                                                                |
| Unique data                                                                                                    | 5090                                                                |
| <i>R</i> <sub>1</sub> <sup>a</sup> , <i>wR</i> <sub>2</sub> <sup>b</sup> ( <i>I</i> > 2 $\sigma$ ( <i>I</i> )) | 0.0466, 0.0927                                                      |
| <i>R</i> <sub>1</sub> <sup>a</sup> , <i>wR</i> <sub>2</sub> <sup>b</sup> (all data)                            | 0.0727, 0.1033                                                      |
| GOF on <i>F</i> <sup>2</sup> (S)                                                                               | 1.040                                                               |
| CCDC number                                                                                                    | 1511315                                                             |

$$^a R_1 = \frac{\sum ||F_o| - |F_c||}{\sum |F_o|}, \quad ^b wR_2 = [\frac{\sum (w(F_o^2 - F_c^2)^2)}{\sum w(F_o^2)^2}]^{1/2}$$



**Table S2.** Absorption data in CH<sub>2</sub>Cl<sub>2</sub> solution ( $5 \times 10^{-5}$  M) at 298 K.

| Compound | $\lambda_{\text{abs}}/\text{nm} (10^3 \epsilon \text{ M}^{-1} \text{ cm}^{-1})$ |
|----------|---------------------------------------------------------------------------------|
| A        | 283 (32.1), 317 <sub>sh</sub> (16.4) 361 (9.2), 388 (8.6)                       |
| 1        | 246 (40.3), 294 (27.9), 367 (8.1), 409 (5.7)                                    |
| 2        | 248 (37.4), 296 (26.3), 392 (6.1), 449 (3.4)                                    |
| dppf     | 232 (47.1), 251 (35.6), 446 (0.48)                                              |

**Table S3.** G09/B3LYP calculated one-electron energy and percentage composition of selected frontier MOs of complex **2** expressed in terms of component fragments.

| MO          | Character     | E (eV)       | Pt         | Me         | bpyO-H      | dppf        |
|-------------|---------------|--------------|------------|------------|-------------|-------------|
| L + 5       | dppf          | -0.44        | 12         | 0.5        | 1.2         | 86.4        |
| L + 4       | dppf          | -0.55        | 6.1        | 1.1        | 13.5        | 79.2        |
| L + 3       | dppf          | -0.58        | 10.2       | 0.3        | 7.3         | 82.2        |
| L + 2       | bpyO-H + dppf | -0.62        | 17         | 0.4        | 44.7        | 37.9        |
| L + 1       | dppf          | -0.72        | 2.7        | 0.1        | 3.8         | 93.4        |
| <b>LUMO</b> | <b>dppf</b>   | <b>-0.88</b> | <b>8.5</b> | <b>0.4</b> | <b>1.3</b>  | <b>89.8</b> |
| <b>HOMO</b> | <b>bpyO-H</b> | <b>-4.82</b> | <b>4</b>   | <b>0.4</b> | <b>92.8</b> | <b>2.8</b>  |
| H - 1       | Pt + bpyO-H   | -5.40        | 49.5       | 3.3        | 39.9        | 7.2         |
| H - 2       | Pt + bpyO-H   | -5.64        | 30.3       | 4.4        | 51.1        | 14.2        |
| H - 3       | dppf          | -5.76        | 2.8        | 0.2        | 8.5         | 88.5        |
| H - 4       | dppf          | -5.77        | 0.8        | 0.1        | 0.7         | 98.4        |
| H - 5       | bpyO-H        | -5.86        | 17.9       | 4.4        | 60.6        | 17.1        |

Energy gap ( $\Delta E$ ) = **3.94 eV** (HOMO-LUMO).

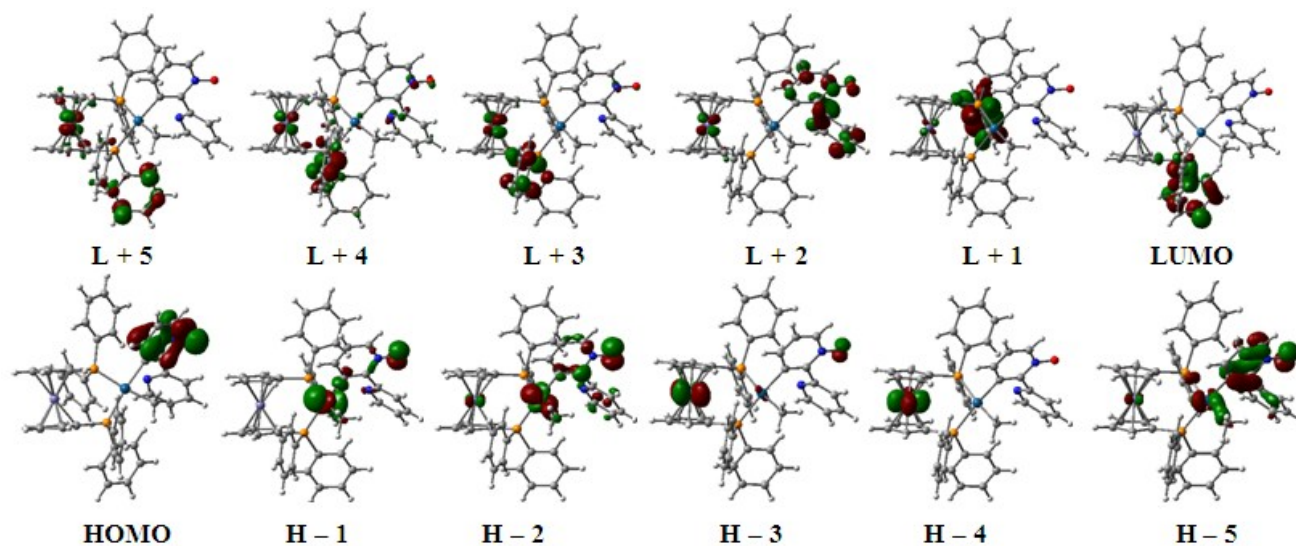

**Figure S6.** Contour plots of the selected frontier molecular orbitals of complex 2.

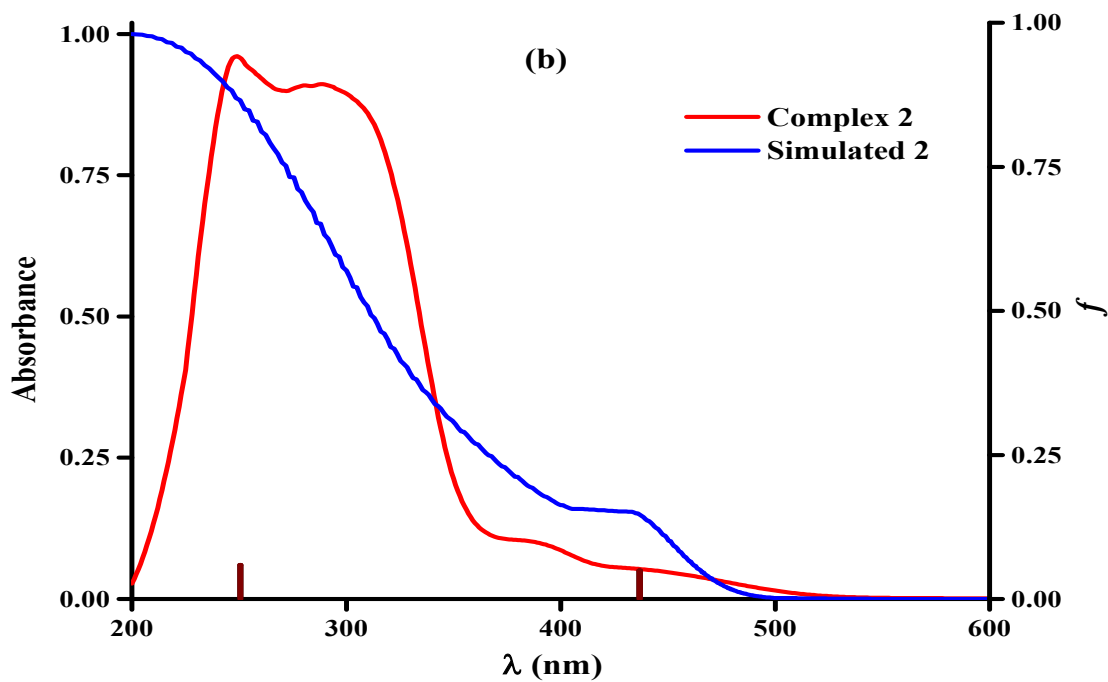

**Figure S7.** Experimental and simulated UV-vis spectra for complexes 2 (calculated absorption spectra, showing by bars).

**Table S4.** Oxidation/reduction potentials for the free dppf ligand and complexes **1-4**, in acetonitrile.<sup>a</sup>

| Compound | $E_p^{\text{red}} / \text{V}$ | $E_p^{\text{ox}} / \text{V}$ |
|----------|-------------------------------|------------------------------|
| <b>1</b> | -0.68                         | +0.07,+0.27 and +1.45        |
| <b>2</b> | ND <sup>b</sup>               | +1.27                        |
| <b>3</b> | -0.64                         | +0.07, +0.43                 |
| <b>4</b> | -0.81                         | +1.47                        |
| dppf     | ND                            | +1.25                        |

<sup>a</sup> All measurements were carried out at 298 K with 0.05 M LiClO<sub>4</sub>-Acetonitrile. Scan rate is 5 mV s<sup>-1</sup> and versus Ag/AgCl reference electrode.

<sup>b</sup> Not determined (no sharp peaks found).

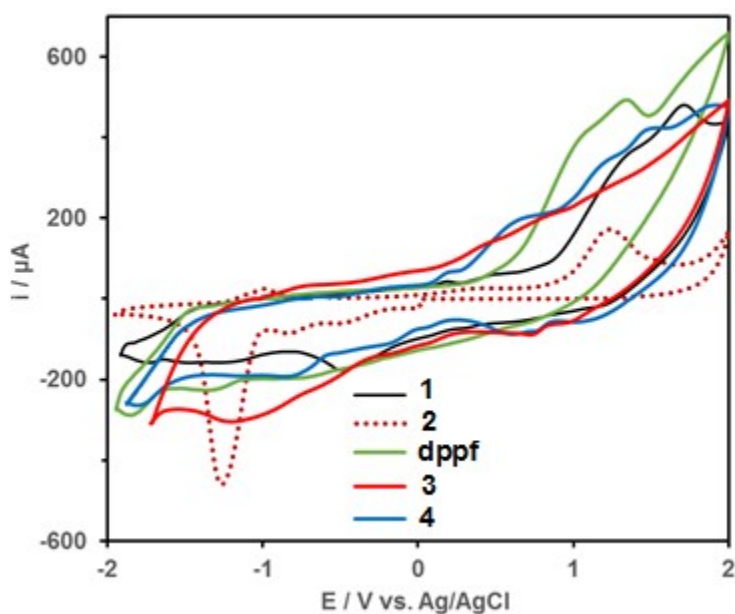

**Figure S8.** Voltammograms recorded for the free dppf ligand and complexes **1-4**, in 0.05 M LiClO<sub>4</sub>-Acetonitrile at a scan rate of 5 mV s<sup>-1</sup>.
